# Supplementary material for: Highly variable response to cytotoxic chemotherapy in carcinoma-associated fibroblasts (CAFs) from lung and breast
Source: PubMed Central journal article supplement (PMC2626600; doi:10.1186/1471-2407-8-364), 2008-12-11

1

2

3

4

5

6

7

8

9

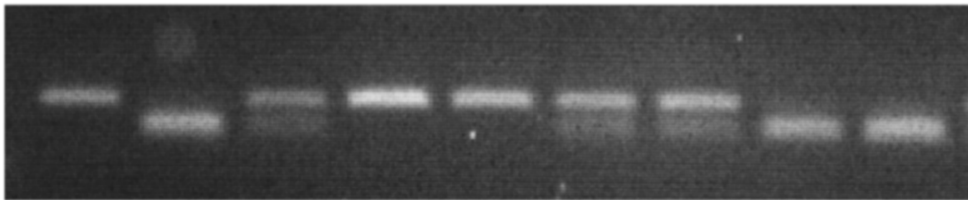

Supplement: 1471-2407-8-364-S2.pdf [file 1471-2407-8-364-S2.pdf]
